# Supplementary material
Source: PubMed Central journal article supplement (PMC8370298)
Supplement: NIHPP2021.05.30.21258086V2-supplement-1.pdf [file NIHPP2021.05.30.21258086V2-supplement-1.pdf]

432 **Supplemental Table 1: Past medical history of children infected with SARS-CoV-2.**  
433

| <b>Past Medical History - Pediatric Patients</b> |
|--------------------------------------------------|
| Acute recurrent pancreatitis                     |
| ADHD                                             |
| Alopecia                                         |
| Asthma                                           |
| Autism                                           |
| Cardiac conduction disorder                      |
| Chronic kidney disease                           |
| Coats Plus Syndrome                              |
| Crohn's disease                                  |
| Cystic Fibrosis                                  |
| Eczema                                           |
| Epilepsy                                         |
| G6PD Deficiency                                  |
| Glutaric acidemia, type 1                        |
| Liver transplant                                 |
| Mitochondrial complex 1 deficiency               |
| Obesity                                          |
| Obstructive sleep apnea                          |
| Prematurity                                      |
| Sickle cell trait                                |
| Speech delay                                     |
| Subglottic stenosis                              |
| Tracheobronchomalacia                            |

434

435

436 **Supplemental Table 2:** Demographics, past medical history and disease severity of adults with  
437 COVID-19 (n=29) included in analysis of SARS-CoV-2 viral load.

|                          | <b>COVID+ adults<br/>(n=29)</b> |
|--------------------------|---------------------------------|
| Age, average (max, min)  | 62 (26,93)                      |
| Sex, number (%)          |                                 |
| Male                     | 13 (45)                         |
| Female                   | 16 (55)                         |
| Race, number (%)         |                                 |
| White                    | 20 (69)                         |
| Black                    | 5 (17)                          |
| Asian                    | 0 (0)                           |
| Other                    | 4 (14)                          |
| Ethnicity, number (%)    |                                 |
| Hispanic                 | 4 (14)                          |
| COVID-19 Severity        |                                 |
| Hospitalized, number (%) | 21 (100)                        |
| Respiratory support      | 22 (78)                         |
| Outpatient, number (%)   | 0 (0)                           |

438

439

440

441 **Supplemental Figure 1:** Viral load by sample collection location. Viral load of samples collected  
442 from nasopharynx (n=60), anterior nares (n=47), or oropharynx (n=19) were compared and  
443 analyzed by ordinary one-way ANOVA. ns = non-significant.

444

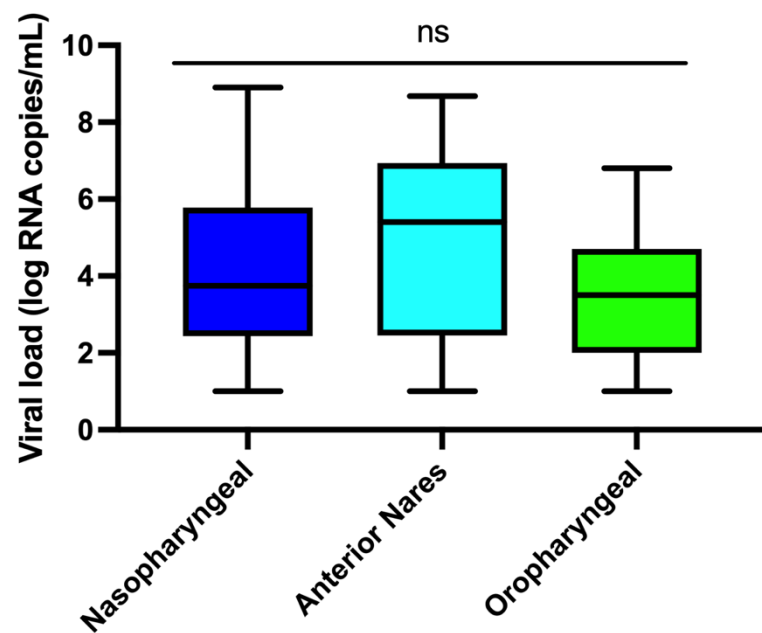

445

446

447 **Supplemental Figure 2:** Viral load plotted against pediatric patient age, for patients with 0-2  
448 days symptoms (n=67), 3-5 days symptoms (n=30), and  $\geq 6$  days of symptoms (n=29). No  
449 significant correlation in any grouping, when analyzed by Pearson correlation. Dotted lines  
450 depict limit of detection. ns = not significant.

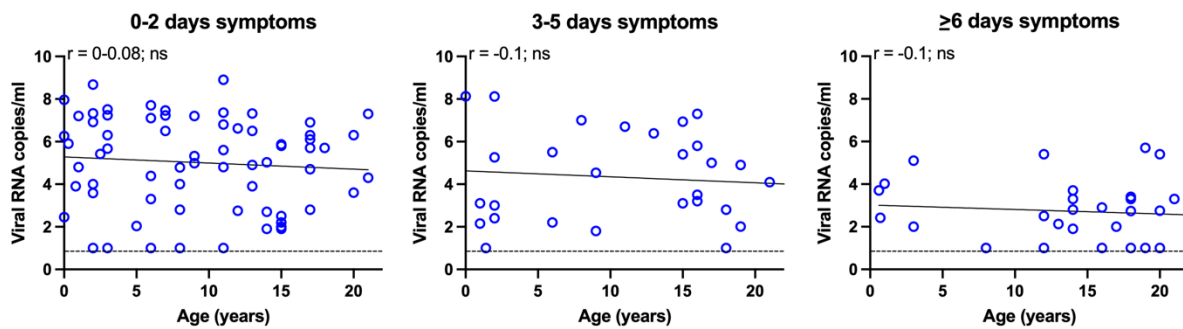

451
